# Supplementary material for: A Simple Graphene Functionalized Electrochemical Aptasensor for the Sensitive and Selective Detection of Glycated Albumin
Source: MDPI journal article supplement (doi:10.3390/app112110315), 2021-11-03
Supplement: s1 [file s1]

Archive with 1 entries (1 files):
- applsci-1390016-supplementary.pdf
