# Supplementary material for: A Simple Graphene Functionalized Electrochemical Aptasensor for the Sensitive and Selective Detection of Glycated Albumin
Source: MDPI journal article supplement (doi:10.3390/app112110315), 2021-11-03
Supplement: s1 [file s1 › applsci-1390016-supplementary.pdf]

# A Simple Graphene-functionalized Electrochemical Aptasensor for the Sensitive and Selective Detection of Glycated albumin

Nang Noon Shean Aye <sup>1</sup>, Pornsuda Maraming <sup>1</sup>, Ratree Tavichakorntrakool<sup>1</sup>, Attawut Chaibunruang<sup>1</sup>, Patcharee Boonsiri <sup>2</sup>, Sakda Daduang <sup>3</sup>, Nattiya Teawtrakul <sup>4</sup>, Prinya Prasongdee <sup>5</sup>, Vittaya Amornkitbamrung<sup>6,7</sup>, Jureerut Daduang <sup>1,\*</sup>

<sup>1</sup>Centre for Research and Development of Medical Diagnostic Laboratories, Faculty of Associated Medical Sciences, Khon Kaen University, Khon Kaen 40002, Thailand; nangnoonshean.aye@kkumail.com, pornsma@kku.ac.th, ratree.t@kku.ac.th, attach@kku.ac.th

<sup>2</sup>Department of Biochemistry, Faculty of Medicine, Khon Kaen University, Khon Kaen 40002, Thailand; patcha\_b@kku.ac.th

<sup>3</sup>Division of Pharmacognosy and Toxicology, Faculty of Pharmaceutical Sciences, Khon Kaen University, Khon Kaen 40002, Thailand; sakdad@kku.ac.th

<sup>4</sup>Division of Hematology, Department of Internal Medicine, Faculty of Medicine, Srinagarind Hospital, Khon Kaen University, Khon Kaen 40002, Thailand; nattiya@kku.ac.th

<sup>5</sup>Clinical Chemistry Unit of Srinagarind Hospital, Faculty of Medicine, Khon Kaen University, Khon Kaen 40002, Thailand; pparin@kku.ac.th

<sup>6</sup>Department of Physics, Khon Kaen University, Khon Kaen 40002, Thailand.

<sup>7</sup>Institute of Nanomaterials Research and Innovation for Energy (IN-RIE), NANOTEC-KKU RNN on Nanomaterials Research and Innovation for Energy, Khon Kaen University, Khon Kaen 40002, Thailand; vittaya@kku.ac.th

\*Correspondence, Centre for Research and Development of Medical Diagnostic Laboratories, Faculty of Associated Medical Sciences, Khon Kaen University, Khon Kaen 40002, Thailand. jurpoo@kku.ac.th, +66840401581

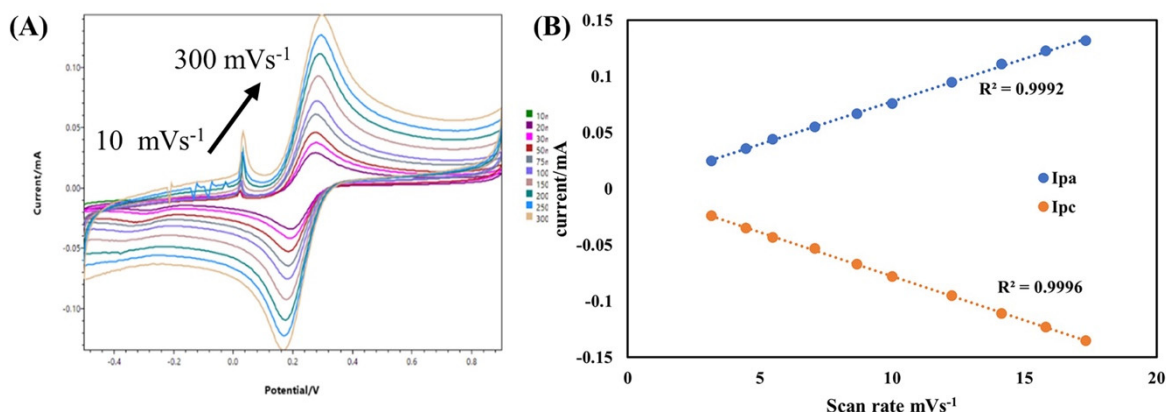

Figure S1 (A) Cyclic voltammograms of GO/SPCEs at different scan rates from 10 to 300 mVs<sup>-1</sup> using 5mM [Fe(CN)<sub>6</sub>]<sup>3-</sup>/[Fe(CN)<sub>6</sub>]<sup>4-</sup> in PBS as redox probe,(B) plot between anodic (I<sub>pa</sub>) and cathodic (I<sub>pc</sub>) peak current vs. square root of the scan rate (v).

### Optimization of the performance of the electrochemical aptasensor

Three electrochemical measurements including DPV, SWV and CV were performed for the detection of GA. Concentrations of GA ( 10, 100, 1000, and 10,000 µg mL<sup>-1</sup>) were prepared in the protein buffer. The aptasensor preparation was the same as in the protocol. The CV was performed with a potential of -0.5 V to 0.9 V at a scan rate of 100 mVs<sup>-1</sup> using 5 mM [Fe(CN)<sub>6</sub>]<sup>4-/3-</sup> as a redox indicator. The DPV measurements were performed in the potential range from -0.1 V to +3 V with pulse amplitude of 25 mV. SWV analysis was more sensitive than other detection methods (Figure S2).

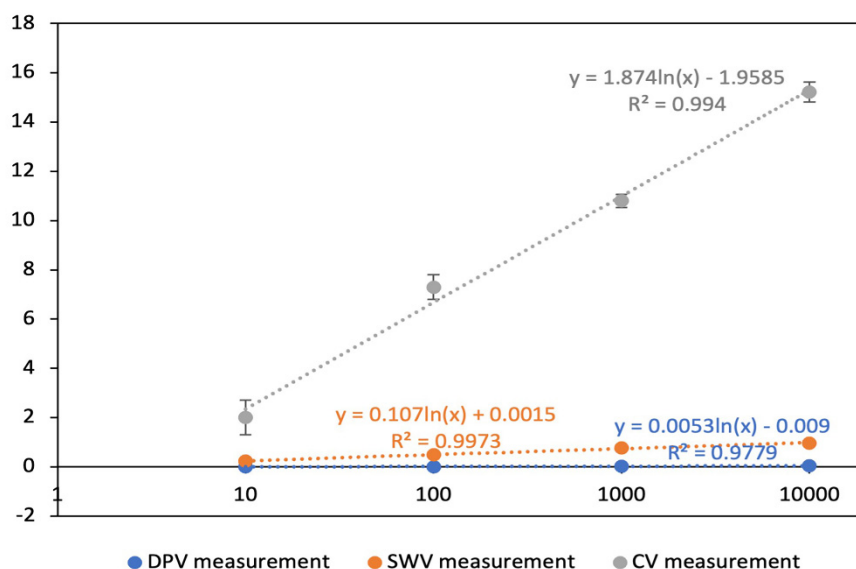

Figure S2 Different electrochemical measurements (DPV,SWV, CV) were applied for the detection of different concentrations of GA (10 - 10,000 µg mL<sup>-1</sup>).

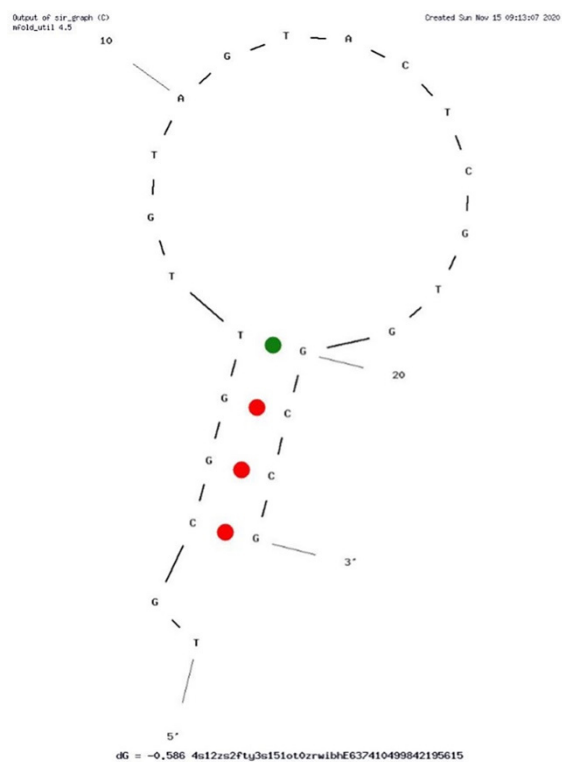

Figure S3 Secondary structure of GA binding aptamer with dG -0.586 kcal/mol predicted at 37°C, under 137 mM sodium (Na) and 1mM magnesium (Mg) concentration.

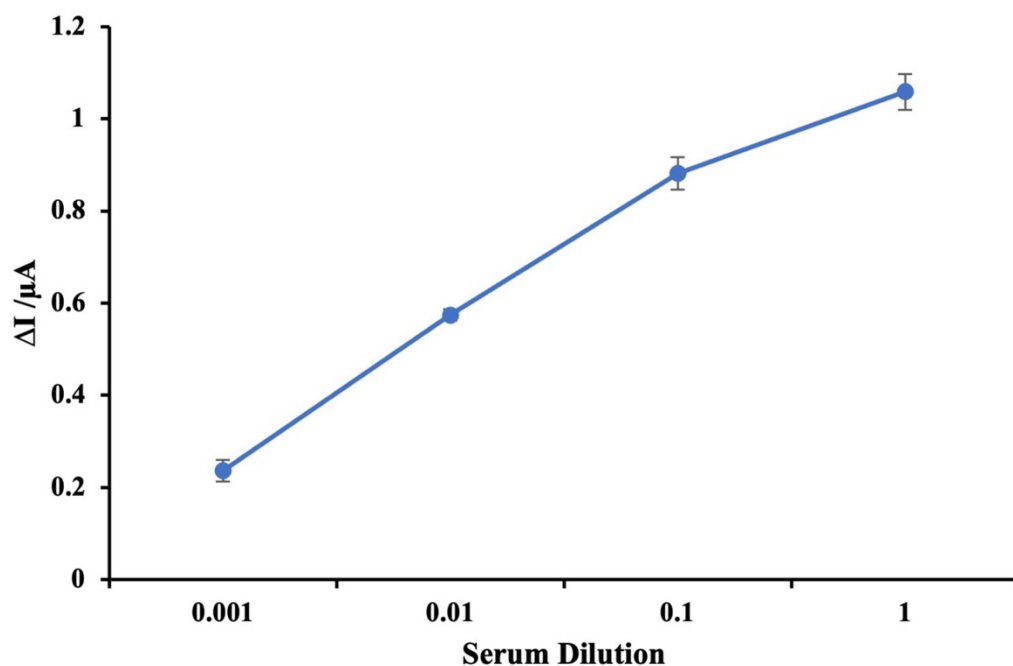

Figure S4 Application of the electrochemical aptasensor to human serum for determination of the optimal dilution of serum.

Table S1 Correlation between GA detected by aptasensor with other glycemic parameters including HbA1c, Fructosamines and Fasting blood sugar (FBS).

| Correlation between parameters                                     | All groups (n=30) |        | DM (n=10) |        | Non-DM (n=20) |        |
|--------------------------------------------------------------------|-------------------|--------|-----------|--------|---------------|--------|
|                                                                    | r                 | p      | r         | p      | r             | p      |
| GA (mg mL <sup>-1</sup> ) and HbA1c (%)                            | 0.514             | 0.004  | 0.320     | 0.368  | 0.019         | 0.230  |
| GA (mg mL <sup>-1</sup> ) and Fructosamine (μmol L <sup>-1</sup> ) | 0.914             | <0.001 | 0.949     | <0.001 | 0.684         | <0.001 |
| GA (mg mL <sup>-1</sup> ) and FBS (mg dL <sup>-1</sup> )           | 0.813             | <0.001 | 0.804     | 0.005  | 0.473         | 0.035  |
